# Supplementary material for: Apoptosis Therapy in Cancer: The First Single-molecule Co-activating p53 and the Translocator Protein in Glioblastoma
Source: PubMed Central journal article supplement (PMC3996484; doi:10.1038/srep04749), 2014-04-23
Supplement: srep04749-s1.pdf [file srep04749-s1.pdf]

## **Apoptosis Therapy in Cancer: The First Single-molecule Co-activating p53 and the Translocator Protein in Glioblastoma**

Simona Daniele<sup>a</sup>, Sabrina Taliani<sup>a</sup>, Eleonora Da Pozzo<sup>a</sup>, Chiara Giacomelli<sup>a</sup>, Barbara Costa<sup>a</sup>, Maria Letizia Trincavelli<sup>a</sup>, Leonardo Rossi<sup>b</sup>, Valeria La Pietra<sup>c</sup>, Luciana Marinelli<sup>c\*</sup>, Elisabetta Barresi<sup>a</sup>, Alfonso Carotenuto<sup>c</sup>, Antonio Limatola<sup>c</sup>, Anna Lamberti<sup>d</sup>, Ettore Novellino<sup>c</sup>, Federico Da Settimo<sup>a</sup>, Claudia Martini<sup>a</sup>

<sup>a</sup>Department of Pharmacy, University of Pisa, Pisa, Italy. <sup>b</sup>Department of Clinical and Experimental Medicine, University of Pisa, Italy. <sup>c</sup>Department of Pharmacy, University of Naples Federico II, Italy. <sup>d</sup>Dipartimento di Scienze Motorie, University of Naples “Parthenope”, Naples, Italy.

## Suppl. Figure 1

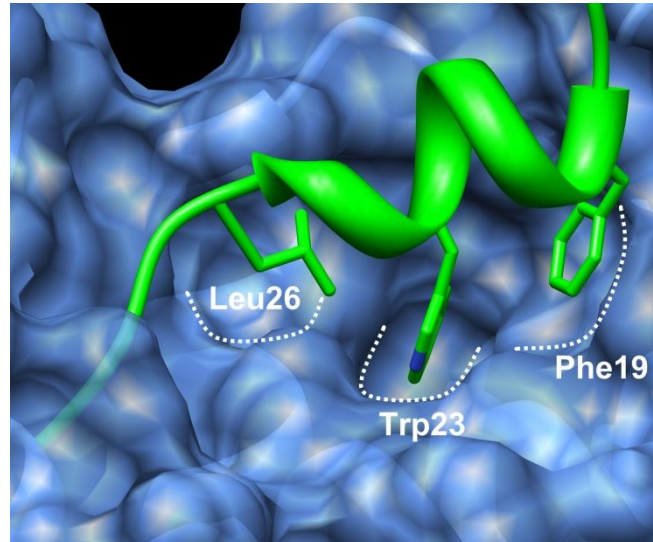

### Supplementary Figure legends

**Suppl. Figure 1.** X-ray co-crystal structure of p53 (green) with MDM2 (cornflower), p53 residues and corresponding binding pockets in MDM2 are labelled in white.

**Full-length blots relative to the cropped images showed in the main Figures**

**Figure 6**

**Figure 6 panel A**

Left panel

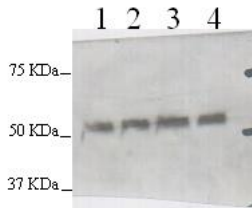

WB: anti-p53

Lanes: 1 = Control  
2 = Compound 1 (1  $\mu$ M)  
3 = Compound 1 (5  $\mu$ M)  
4 = Compound 1 (10  $\mu$ M)

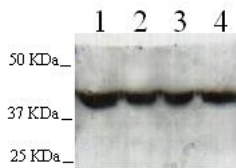

WB: anti- $\beta$ -actina

Lanes: 1 = Control  
2 = Compound 1 (1  $\mu$ M)  
3 = Compound 1 (5  $\mu$ M)  
4 = Compound 1 (10  $\mu$ M)

Right panel

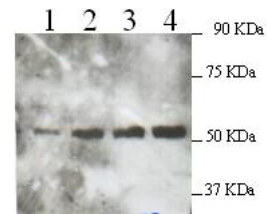

WB: anti-p53

Lanes: 1 = Control  
2 = Compound 7 (1  $\mu$ M)  
3 = Compound 7 (5  $\mu$ M)  
4 = Compound 7 (10  $\mu$ M)

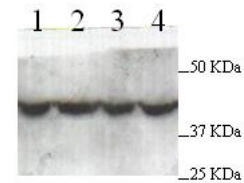

WB: anti- $\beta$ -actina

Lanes: 1 = Control  
2 = Compound 7 (1  $\mu$ M)  
3 = Compound 7 (5  $\mu$ M)  
4 = Compound 7 (10  $\mu$ M)

**Figure 6 panel C**

Upper panel

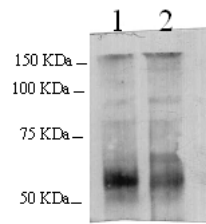

IP: anti-MDM2 WB: anti-p53  
Lanes: 1 = Control  
2 = Compound 1 (5 μM)

Lower panel

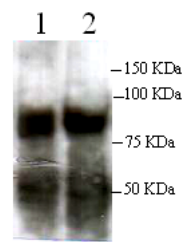

IP: anti-MDM2 WB: anti-MDM2  
Lanes: 1 = Control  
2 = Compound 1 (5 μM)

**Supplementary Table 1. Real-time RT-PCR: primer nucleotide sequences, position in mRNA sequence and amplicon length.**

| Name and other designations                                                                  | Accession number<br>mRNA length | Primer nucleotide sequences                                         | Primer position in mRNA sequence         | Tm (°C)  | Amplicon length |
|----------------------------------------------------------------------------------------------|---------------------------------|---------------------------------------------------------------------|------------------------------------------|----------|-----------------|
| Mdm2, p53 E3 ubiquitin protein ligase homolog (mouse) (MDM2)                                 | NM_002392.4<br>7472 pb          | FOR: 5'-TCTAGGAGATTTGTTTGGCGT-3'<br>REV: 5'-TCACAGATGTACCTGAGTCC-3; | Exon 4 (548-568)<br>Exon 6 (653-672)     | 60<br>60 | 125 pb          |
| Cyclin-dependent kinase inhibitor 1A (p21, Cip1) (CDKN1A)                                    | NM_000389<br>2175 pb            | FOR: 5'-TGCCGAAGTCAGTTCCTTG -3'<br>REV: 5'-CATGGGTTCTGACGGACATC-3'  | Exon 3 (50-68)<br>Exon 4 (144-163)       | 60<br>62 | 134 pb          |
| Bcl2 binding component 3 (BBC3), JFY1, PUMA                                                  | NM_001127240<br>1839 pb         | FOR: 5'-GAGGAGGAACAGTGGGC-3'<br>REV: 5'-CTAATTGGGCTCCATCTCGG-3'     | Exon 4 (652-668)<br>Exon 5 (830-849)     | 56<br>62 | 198 pb          |
| Tumor protein p53 (TP53), antigen NY-CO-13, cellular tumor antigen p53, p53 tumor suppressor | NM_001126112<br>2588 pb         | FOR: 5'CTTTGAGGTGCGTGTTTGTG-3'<br>REV: 5' GTGGTTTCTTCTTTGGCTGG-3'   | Exon 8 (1006-1025)<br>Exon 9 (1147-1166) | 60<br>60 | 161 pb          |
| Actin,beta (ACTB)                                                                            | NM_001101.3<br>1852 pb          | FOR: 5'-GCACTCTTCCAGCCTTCCTTCC-3'<br>REV-5'-GAGCCGCCGATCCACACG-3'   | Exon 4 (862-884)<br>Exon 6 (1097-1115)   | 70<br>62 | 254 pb          |
